# Supplementary material for: A simple assay for probing transformations of superparamagnetic iron oxide nanoparticles in human serum
Source: Royal Society of Chemistry journal article supplement (doi:10.1039/c9cc01642b), 2019-01-01
Supplement: c9cc01642b1.pdf [file c9cc01642b1.pdf]

## A simple assay for probing transformations of superparamagnetic iron oxide nanoparticles in human serum†

### Electronic supporting material

#### Size characterization of SPIONs

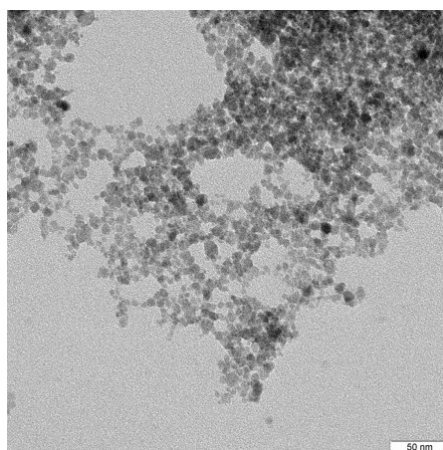

**Fig. S1** An TEM image of SPIONs, revealing a  $5.8 \pm 1.8$  core size (transmission electron microscope Zeiss Libra 120).

#### Analytical measurements

**Table S1** Parameters of ICP-based methods

| Parameter                           | MS                                | AES <sup>a</sup>                   |
|-------------------------------------|-----------------------------------|------------------------------------|
| Plasma gas flow                     | 16.5 L min <sup>-1</sup>          | 12.0 L min <sup>-1</sup>           |
| Auxiliary gas flow                  | 0.6 L min <sup>-1</sup>           | 0.5 L min <sup>-1</sup>            |
| Nebulizer Ar flow                   | 0.9 L min <sup>-1</sup>           | 0.5 L min <sup>-1</sup>            |
| Analyzed sample flow                | 0.9 mL min <sup>-1</sup>          | 1.8 mL min <sup>-1</sup>           |
| RF power                            | 1250 W                            | 1250 W                             |
| Dwell time                          | 1 ms                              | -                                  |
| Isotopes monitored / spectral lines | <sup>32</sup> S, <sup>57</sup> Fe | 182.034 nm (S),<br>259.940 nm (Fe) |
| Spectral resolution mode            | medium                            | -                                  |

<sup>a</sup> An iCAP-6500 Duo spectrometer (Thermo Scientific, USA).

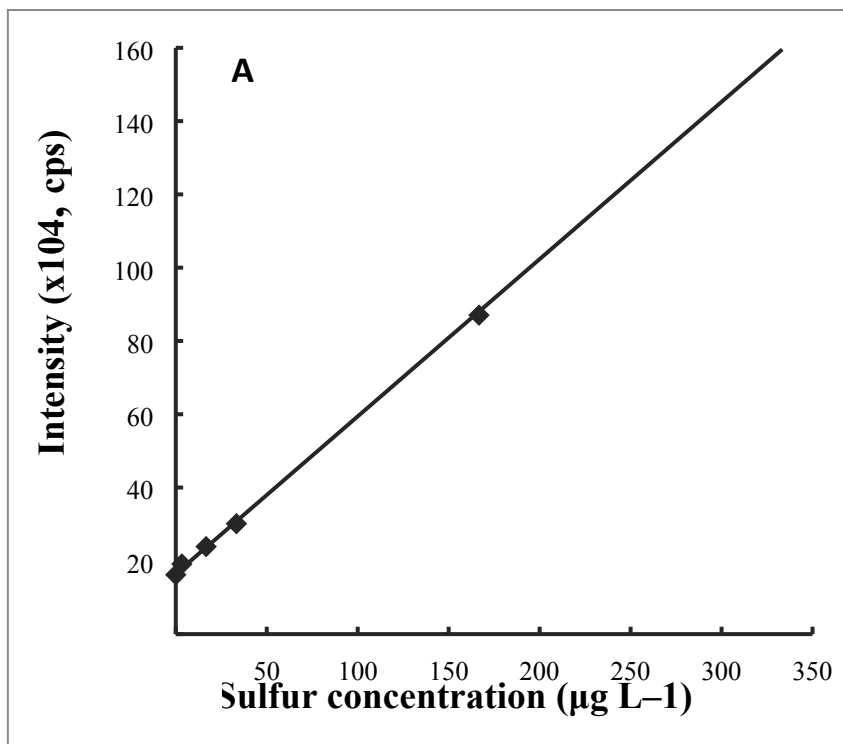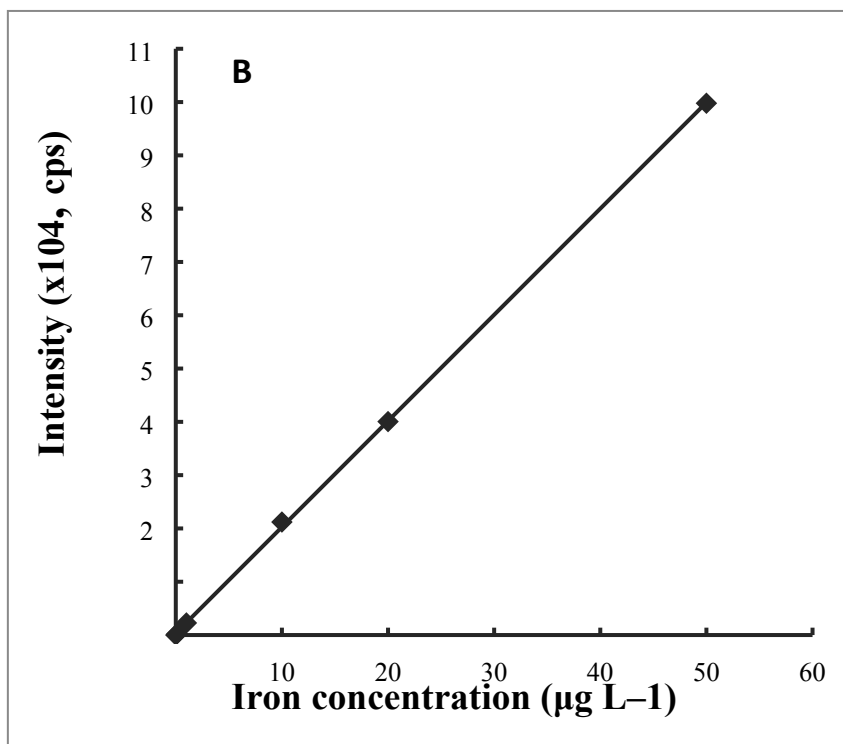

**Fig. S2** Calibration lines for sulfur (A) and iron (B)

**Binding to histidine**

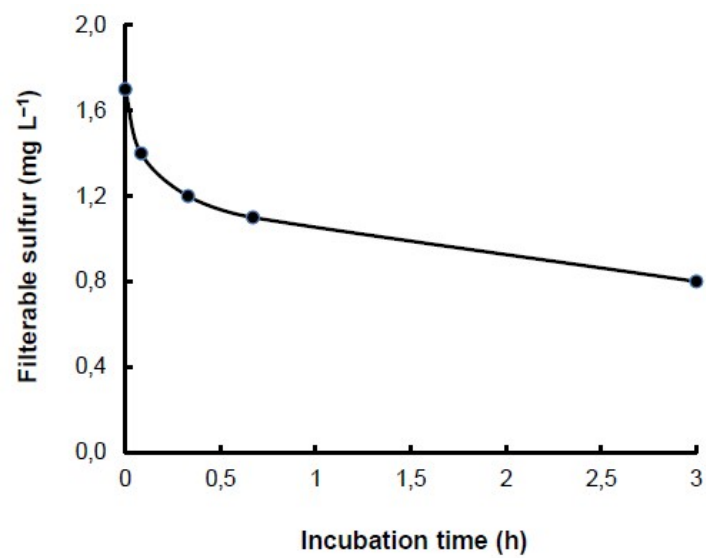

**Fig. S3** Dependence of histidine concentration on the time spent on coating of SPIONs. Initial concentration of histidine,  $3.7 \times 10^{-6}$  M; for other conditions, see the main text.
